# Full title

Investigating the barriers and enablers to outbreak reporting in the Asia-Pacific region: a mixed-methods study protocol

## Short title

Barriers and enablers to outbreak reporting in the Asia-Pacific region

## Authors

Amish Talwar<sup>1</sup>; Rebecca Katz<sup>2</sup>; Martyn D. Kirk<sup>1</sup>; Tambri Housen<sup>1,3</sup>

## Affiliations

<sup>1</sup> National Centre for Epidemiology and Population Health, Australian National University, Canberra, Australian Capital Territory, Australia

<sup>2</sup> Center for Global Health Science and Security, Georgetown University, Washington, DC, United States

<sup>3</sup> School of Medicine and Public Health, University of Newcastle, Newcastle, New South Wales, Australia

## Corresponding author

E-mail: [amish.talwar@anu.edu.au](mailto:amish.talwar@anu.edu.au) (AT)

## Abstract

## Introduction

The COVID-19 pandemic has raised concerns about the global capacity for timely outbreak reporting. However, gaps remain in our understanding of barriers and enablers to outbreak reporting, particularly at the local level. Field epidemiology training program (FETP) fellows often participate in the outbreak reporting process as part of both their training and the public health roles they assume after graduating; they therefore represent a potentially valuable source of information for better understanding these barriers and enablers. This study will investigate the barriers and enablers to outbreak reporting through a mixed methods approach that will encompass a review of the existing literature as well as surveying and interviewing FETP trainees and graduates from the Asia-Pacific region.

## Methods

This study will begin with a scoping review of the literature to identify existing evidence of barriers and enablers to outbreak reporting. Based on our findings from the scoping review, we will administer a survey to FETP trainees and graduates from the World Health Organization Western Pacific and South-East Asian Regions and conduct interviews with a subset of survey respondents to investigate the survey findings in more detail. We will summarise and compare the survey results according to various country-level economic and political indicators, and we will employ thematic analysis to evaluate the interview responses. Based on the findings from the scoping review, survey, and interviews, we will construct a model to comprehensively describe the various barriers and enablers to outbreak reporting.

## Discussion

This study will contribute to our understanding of the determinants of outbreak reporting across several geographic, political, and economic contexts by eliciting the viewpoints and experiences of persons involved with outbreak reporting, particularly at the local level. This information will help improve the outbreak reporting process, allowing for more timely reporting and helping prevent future outbreaks from becoming pandemics.

## Introduction

The global reaction to the COVID-19 pandemic has raised concerns about the world's collective ability to detect, report, and respond to infectious disease outbreaks. Outbreak reporting is the process by which infectious disease outbreaks, once detected, are reported to public health officials; initial reporting to local public health officials is typically followed by escalation of the report to more senior public health authorities and, where necessary, to the international community to formulate an appropriate outbreak response. Timely outbreak reporting in turn can make the difference between containing an outbreak at its source and an outbreak growing into an epidemic or pandemic. The timeliness of outbreak reporting is contingent on a state's capacity to detect and report an outbreak up to the national level and its willingness to report it to the international community once aware of the outbreak within its borders. Thus, under the 2005 International Health Regulations (IHR), all IHR signatories have an obligation to develop and maintain the capacity to detect infectious disease outbreaks that can become international threats and to report these outbreaks to the international community through the World Health Organization (WHO) [1]. Under the IHR, most countries have agreed to report potential health events of international significance within 24 hours of determining the existence of such an event [1].

However, delays in outbreak reporting at various levels of the reporting chain have persisted even after the revised IHR came into effect. This was the case for the Ebola outbreak in

Western Africa and most recently during COVID-19, where local delays in reporting the existence and extent of the COVID-19 outbreak at its initial stages delayed the global response to the outbreak by several weeks, allowing it to grow into a global pandemic [2-3]. To prevent future pandemics, it is crucial to understand why nearly 20 years following the adoption of the most recent version of the IHR countries still experience failures reporting outbreaks in line with their international obligations.

Although there is a wide breadth of research on the various barriers and enablers across the outbreak reporting chain, comparatively little research has focused on the barriers and enablers at the local level, where outbreak reports originate. This is particularly true in the Asia-Pacific region, from where several pandemics have emerged in recent decades. Field epidemiology training programs (FETPs) produce skilled epidemiologists who learn to perform public health functions through experiential learning in field settings at the local and subnational level [4]. As part of their training, FETP trainees typically participate in surveillance and outbreak reporting activities [5]. Thus, FETP participants have unique insights into the various determinants of outbreak reporting, particularly at the local level. Therefore, this study seeks to leverage the knowledge of FETP-trained officials in the Asia-Pacific region to fill this knowledge gap by examining their observations and experiences regarding the factors that inhibit or enable outbreak reporting through a survey and key informant interviews.

## **Evidence gap**

Previous studies that have examined the determinants of outbreak reporting have largely focused on countries' ability to detect and report outbreaks. While outbreak preparedness indices such as the Global Health Security Index (GHSI) mainly report on nation-level capacity for outbreak detection and reporting, other studies have focused on determinants

commonly found across different countries. In one such study, officials from Brazil, Ethiopia, Liberia, Nigeria, and Uganda identified a series of bottlenecks and enablers to outbreak detection and notification at all levels of their national public health systems [6-7]. These included the availability of core surveillance infrastructure (including laboratory infrastructure), physical infrastructure (including access to appropriate communications and transportation to facilitate outbreak detection and reporting), personnel resources and knowledge, community knowledge, and inter-agency cooperation and coordination [7]. Having adequate and appropriately trained personnel to report remains a lynchpin for outbreak reporting. Therefore, additional research has examined the role of health care providers at the local level in reporting, who often are the first to detect potential outbreak cases and have the responsibility to report these cases to public health officials. These studies have identified various barriers to reporting among health care providers, including lack of reporting knowledge as well as lack of time and motivation to report [8-12].

Although capacity to report is a prerequisite for timely outbreak reporting, an environment conducive to reporting is also important for effecting an appropriate outbreak response, especially for outbreaks that threaten to grow rapidly and cross borders. A handful of studies have examined this additional condition for reporting among national governments. Two such studies involved surveys and interviews with officials affiliated with National Focal Points (NFPs), which are the country persons or offices responsible for collecting outbreak information and relaying information on potentially significant outbreaks to WHO for further dissemination to the international community to ensure an appropriate global response [13]. While the respondents agreed that inadequate surveillance and reporting infrastructure was a major reporting barrier at all levels, they also indicated that fear of damage to tourism and trade as well as “political challenges” were important barriers to outbreak reporting at the national level [13-14]. These findings provided qualitative evidence supporting the results of

a previous study, which found that countries that are particularly vulnerable to trade or travel barriers after reporting an outbreak or in which higher domestic political opposition is present were more likely to demonstrate less timely reporting internationally, even after controlling for capacity to detect an outbreak [15].

Although these studies have helped define the determinants of outbreak reporting at various levels among a handful of countries, few studies have investigated the experiences of local and subnational public health officials within the Asia-Pacific region. This represents a significant gap given that this region contains over half the world's population, and four of the seven respiratory disease pandemics of the 20th and 21st centuries emerged from this region alone [3,16-20]. The handful of studies from the region that have investigated reporting barriers and enablers at the local and subnational levels have largely corroborated the above findings; however, they have focused on specific countries or disease contexts [21-23]. Furthermore, none of these studies have examined in-depth whether reporting officials, including both public health officials and health care providers, have experienced pressures to not report for either political, security, or economic reasons, despite such pressures likely having played a role during previous outbreaks, including SARS and COVID-19 [24-25]. Lastly, these studies have failed to assess the relative importance of the various putative barriers and enablers to outbreak reporting. To address these gaps, this study will survey and interview FETP trainees and graduates across the Asia-Pacific region on their experiences and observations regarding putative barriers and enablers to outbreak reporting. Such a region-wide study can inform regionally relevant approaches to improve outbreak reporting and collaborative response.

## Study question and objective

Our research question is the following:

- What are the barriers and enablers to outbreak reporting in the Asia-Pacific region at the local and subnational levels?

The objective of this study will be to elicit the views of FETP trainees and graduates from the Asia-Pacific region on the barriers and enablers to outbreak reporting based on their personal observations and experiences. This information will help identify potential interventions that can improve the outbreak reporting process and help prevent future outbreaks from becoming pandemics.

## Methods and Analysis

### Study design

This study will employ a mixed methods approach to assess these barriers and enablers by using both quantitative and qualitative methods for collecting data, which will then be integrated to derive findings and insights not possible with either approach alone [26]. Specifically, this study will use an explanatory sequential design (Fig 1) in which a survey will first be administered to FETP trainees and graduates to explore their views on the importance of putative barriers and enablers to outbreak reporting [27]. The survey questions will be informed by a scoping review of the literature and consultations with subject matter experts affiliated with FETPs in the Asia-Pacific region and will be piloted with persons experienced with FETPs and outbreak reporting. Following survey administration, we will conduct semi-structured interviews with a subset of survey respondents to investigate the survey findings in more detail and to evaluate how they differ among varying geographic, political, and socioeconomic contexts [26,28]. Thus, the interviews will focus on both explaining and contextualizing the survey findings based on the unique perspectives and circumstances of these participants. Using data from the scoping review, survey, and interviews, we will construct a candidate conceptual model to describe the various barriers

and enablers to outbreak reporting from the local level to the national level and internationally. Participant recruitment began on 16 November 2023 and remains ongoing; we intend to end recruitment on 31 May 2024.

**Fig 1. Explanatory sequential study design.**

## **Study population**

Our target population for the survey will be FETP trainees and graduates from FETPs located in the WHO Western Pacific Region (WPRO) and South-East Asian Region (SEARO) [29]. The nature and size of the population of persons with outbreak reporting responsibilities at the local and subnational levels in the WHO WPRO and SEARO regions are unclear. Therefore, we will employ maximum variation sampling to capture a wide range of regional backgrounds and responses by approaching all FETPs from the two regions to administer the survey among current trainees and graduates [28]. In addition, we will disseminate the survey through the Training Programs in Epidemiology and Public Health Interventions Network (TEPHINET) global alumni listserv. TEPHINET helps develop and connect the various FETPs globally and can reach FETP alumni registered with TEPHINET [30].

For the interview phase, we will approach a subset of survey respondents who indicate willingness to be interviewed. We will again employ maximum variation sampling to select a diverse range of interviewees to reflect viewpoints and experiences across a variety of reporting settings among the regions surveyed. We will preferentially target survey respondents who provide detailed free text responses.

## **Sampling**

### **Survey**



As of 2023, there are 3,623 graduates from the 21 FETPs in the WPRO and SEARO regions listed with TEPHINET combined [31]. It is unclear how many FETP participants are currently in training; based on our experience with FETPs in these regions, we estimate that each of the 21 WPRO and SEARO FETPs listed with TEPHINET typically has two to five trainees at any one time, for a total of approximately 42-105 trainees from both regions [31]. For this study, we will use the mean of this range (74 trainees) as our estimate for the total number of trainees. As part of field epidemiology training, all trainees are expected to be involved in surveillance and outbreak reporting. Although it is unclear how many FETP graduates from these regions continue to perform outbreak- and surveillance-related activities after graduating, a previous study found that 65.7% of graduates from the Eastern Mediterranean region investigate outbreaks, and 69.9%–71.7% work in public health surveillance [5]. Assuming that approximately 70% of graduates in the WPRO and SEARO regions also conduct surveillance and outbreak reporting activities, we anticipate a sample frame for this study of 2,610 persons. Based on a Cochran sample size calculation, we estimate our target sample size to be 335 persons at  $\alpha=0.05$  and  $p=0.5$  [32]. Previous studies have found the response rate for online surveys to be between 34% and 48% [33]. Because of the added challenges of responding to an online survey in a resource-limited setting and potential language barriers in completing a survey in the English language, we will assume a more conservative response rate of less than half this range, meaning that we assume a minimum 17% response rate; for our target sample size, this would require reaching out to 1,971 persons. Thus, to meet our sample size goal, we will reach out to all 21 listed FETPs in the WPRO and SEARO regions to obtain permission to circulate the survey to trainees and graduates. We will also solicit participation from FETPs not listed with TEPHINET to maximize our sample. To determine a more exact target sample size for this population, we will ask each training program to provide information on the total number of trainees and graduates within their programs.

## 211 **Semi-structured interviews**

212 We will select respondents using a maximum variation sampling approach to reflect the  
 213 geographical and economic diversity among the WPRO and SEARO countries and to identify  
 214 shared patterns of experiences that cut across different national settings [28]. Interviews will  
 215 continue until saturation has been reached (i.e., new data repeats what was expressed in  
 216 previous data, and elicited themes begin to stabilise) or the list of candidate interviewees has  
 217 been exhausted [34]. We will aim to interview at least 20 persons, with no more than three  
 218 persons representing any individual country to ensure representation of varying reporting  
 219 contexts [35].

## 220 **Data collection**

### 221 **Scoping review**

222 We will scope both the peer-reviewed and grey literature according to the PRISMA  
 223 Extension for Scoping Review guidelines (PRISMA-ScR) to develop a more comprehensive  
 224 understanding of the existing evidence of barriers and enablers to outbreak reporting among  
 225 both primary data (e.g., data collected through interviews, focus groups, and surveys) and  
 226 secondary data analysis (e.g., analysis of country-level data) [36]. We will identify relevant  
 227 peer-reviewed literature (both quantitative and qualitative studies, including systematic and  
 228 scoping reviews) and grey literature (non-peer reviewed reports and government documents)  
 229 published from 15 January 2008 (six months after the 2005 IHR went into effect) to 31  
 230 December 2023 among three online databases (PubMed, Scopus, and Web of Science) and  
 231 Google Scholar. We will use search terms designed to elicit sources that address 1) outbreak  
 232 reports and 2) barriers and enablers to outbreak reporting. In addition, we will search the  
 233 reference lists of sources chosen for data abstraction for additional literature to review, and  
 234 we will review country outbreak After Action Review reports provided by WHO [37].

## Survey

The survey will collect demographic information as well as experiences with FETPs and outbreak reporting. Demographic information will include age, gender, level of education, country of work, public health role, type of FETP training, and country through which the FETP training was completed. The questions investigating knowledge and experiences with putative barriers and enablers to reporting will be generated based on previous research, including the scoping review. These questions will focus on barriers and enablers related to capacity, coordination, and communication; training and socialization around reporting; motivation and incentives to report; and authority to report. In addition, the survey will investigate whether reporting officials have felt pressure to not report or feared economic consequences from reporting to evaluate the impact of organizational, political, and economic factors on reporting. The relative importance of these barriers and enablers to outbreak reporting will be assessed using a Likert scale of 1 to 3, where 1 equals “No impact”, 2 equals “Some impact”, and 3 equals “High impact”. Free text prompts will allow respondents to further contextualize their responses. We will refine the survey based on input provided by subject matter experts affiliated with FETPs in the Asia-Pacific region. We will then pilot the survey with persons experienced with FETPs and outbreak reporting, including FETP trainers and graduates. The survey will be administered through Qualtrics [38].

We will analyse the survey findings in the context of various empirical economic and political indicators by which the respondents’ country of work can be classified. Although a previous study did not find a correlation between regime type and outbreak reporting time, a later study did find that domestic commitment to rule of law was significantly associated with outbreak reporting time [15,39]. This latter study also found that development level (i.e., gross domestic product [GDP] per capita), exports and imports as a share of GDP, and contribution of travel and tourism to GDP were significantly associated with outbreak

reporting time [15]. Another study found that increased internet usage and freedom of the press were associated with timelier outbreak reporting, which might reflect the availability of unofficial channels for outbreak reporting, including rumours and media reports [40]. To account for the impacts of these factors on outbreak reporting, we will stratify the respondents' country of work according to the following covariates and compare the survey results across these strata: income level, trade exposure according to GDP, contribution of travel and tourism to GDP, rule of law based on the Worldwide Governance Indicators, number of internet users, and freedom of the press [41-45].

## **Semi-structured interviews**

Interviews will be either held in-person or online on Zoom between the first author and each participant individually. The interviews are anticipated to last for 45 to 60 minutes. The results of the scoping review and survey will inform the creation of semi-structured interview questions for the interviews. These questions will elicit further contextual information and perspectives regarding commonly identified barriers and enablers as well as details about unique barriers and enablers that are outliers with respect to these findings. We will transcribe the interviews verbatim to facilitate data analysis.

## **Reflexivity**

The primary researcher's background as a physician and public health specialist with field epidemiology training and outbreak response experience informed his interest in the research question based on his experience that timely outbreak detection and reporting are crucial to effective outbreak containment. This background also helped the primary researcher identify FETP trainees and graduates as a likely valuable source of information on the outbreak reporting process. However, the primary researcher's training and experience can also affect the interview questions asked, interpretations made, and the researcher-interviewee dynamic

itself by providing a pre-defined understanding of outbreak reporting for the researcher and how it can be ideally realised, which might differ from the experiences and understandings of the interviewees. To facilitate reflexivity, the primary researcher will keep a research journal to record post-interview reflections to engage their evolving perception of the data with respect to their own experiences, shape understanding of the researcher-interviewee dynamic, inform future interviews, and refine candidate interview themes [46].

## **Data analysis**

### **Scoping review**

Data extraction and analysis will proceed per established guidelines for scoping reviews [47]. We will extract the following data from the selected literature into a Microsoft Excel spreadsheet: study author, title, journal name, year of publication, and study type; study purpose, methodology, target population, location, and start/end date; and evidence for barriers and enablers to outbreak reporting. Based on the extracted data, we will summarize the reviewed literature based on numbers of sources per country, target population, study type, and methodology; we will present these data in a table along with a descriptive summary. We will also identify common findings across the various literature reviewed and will synthesize these thematically into a coherent narrative description, which will be summarized in a table or flowchart. The results of this review will inform the construction of survey questions about respondents' experiences with barriers and enablers to outbreak reporting.

### **Survey**

We will report counts and percentages for all variables. For Likert variables, we will report median and interquartile range. We will analyse differences in weighted median ordinal responses and GHSI scores for detecting public health events according to the covariates

described above (rule of law, trade exposure, contribution of travel and tourism to GDP, country income level, number of internet users, and freedom of press), where weighted medians will be calculated for each stratum [48]. We will compare weighted median ordinal responses and GHSI scores between different income groups using the Kruskal-Wallis test, and we will employ the pair-wise Wilcoxon rank sum test for post-hoc analysis to determine which groups significantly differ ( $\alpha=0.05$ ). For rule of law, trade exposure, travel and tourism, internet use, and freedom of press indicators, we will assess for association with weighted median ordinal responses and GHSI scores using Spearman's rank correlation ( $\alpha=0.05$ ). We will perform all quantitative survey analyses in R [49].

We will thematically summarize the findings from the free text box responses using content analysis, where we will inductively code the text into thematic categories and triangulate these findings with the scaled responses [27,50]. We will then use the triangulated findings to inform the interview questions, thereby integrating the study designs [50,51]. Where example quotes are provided verbatim, the quotes will not be attributable by country to protect respondents from unintentional identification.

### **Semi-structured interviews**

We will use thematic analysis incorporating the Framework Method to analyse the interview data [52-53]. First, we will deductively code themes elicited from the findings from the scoping review and survey and group the codes within a working analytical framework [53]. Using these codes, two researchers will then conduct a thematic analysis employing a "coding reliability" approach where they will label themes identified in the interviews with these predetermined codes; while one of the coders will be an existing researcher on our team, the other coder will be an outside researcher unaffiliated with the study [52-53]. To begin, the coders will review the interview transcripts and corresponding audio to familiarise themselves with the data. Next, the two coders will code the interview data into a framework

matrix [53]. After coding at least the first three transcripts, the two researchers will meet to compare their coded transcripts and to adjust the analytical framework where necessary given the transcript data, including adding new codes or modifying/deleting existing codes [53]. The coders will continue to adjust the analytic framework as needed until the final transcript has been coded [53]. On completion of coding, the coders will interpret the matrix data to identify overarching themes, including themes consistent with the previous scoping review and interview data as well as novel ones [53]. In addition, we will calculate the level of agreement between the two coders using Cohen's kappa and recode as necessary if significant differences emerge [52]. Where necessary to discuss participant work location, we will report WHO region and country income level stratum instead of country name to protect interviewee privacy given that both interview findings and country name data might together facilitate interviewee identification. We will code the interview data using NVivo 12 and generate the analytical framework within a Microsoft Excel spreadsheet [54].

## **Data interpretation**

We will depict the integrated findings from the scoping review, survey responses, and interviews using joint displays to visually draw out unique insights that are only accessible through joint interpretation of the quantitative and qualitative data [51,55]. Based on these findings, we will develop a conceptual model incorporating all the known factors that impact outbreak reporting at the local, subnational, and national levels and their interactions across all levels. We will share preliminary interview findings with interviewees to obtain feedback on our results and interpretation.

## **Patient and public involvement**

As stated above, we will consult with subject matter experts to develop the survey instrument and will reach out to TEPHINET and FETPs to disseminate the survey among FETP trainees

357 and graduates. We will directly recruit interviewees among survey respondents who volunteer  
358 to be interviewed.

## 359 **Ethics and Dissemination**

### 360 **Ethics**

361 The proposed research activities have been approved by the Human Ethics Office at the  
362 Australian National University (protocol number 2023-196). We will apply for any protocol  
363 amendments with this office.

### 364 **Consent**

365 Before beginning the survey or interview, participants must read a “Participant Information  
366 Sheet” that outlines the study; they must then click “Yes” to the survey question asking for  
367 consent to participate in the survey or sign and submit by email or post a written consent  
368 form to be interviewed. Participation in the survey and interviews will be voluntary, and  
369 participants are free to withdraw from participation at any point while taking the survey or  
370 being interviewed.

### 371 **Confidentiality**

372 We will keep participant identities confidential as far as allowed by law. For the survey we  
373 will not require name or contact information unless the respondent would like to be contacted  
374 to participate in an interview. We will use this information to create a candidate interviewee  
375 list; after abstracting this contact information into this list, we will delete this information  
376 from the survey platform. The data interviewees provide will be de-identified, including  
377 name as well as any incidentally identifying information provided during the interview.  
378 Identifying details (i.e., name and email address) will be stored separately from the rest of the



research data in the candidate interviewee list, which will be linked back to each interview within this document. Access to the data will be restricted to the research team. Published results will only be reported in aggregate (except for de-identified quotations where appropriate), and participants will not be identifiable within published outputs. Furthermore, as interview participants could potentially be identified from a publication based on being associated with their country affiliation, these country affiliations will not be referred to in any publication.

## **Expected output**

We will use previous research and results from this study to develop a conceptual model incorporating all the known factors that impact outbreak reporting at the local, subnational, and national levels. This will allow for the coordinated development of key interventions appropriate for each reporting level to improve the outbreak reporting process. More generally, this study will highlight the need to account for the many different determinants of outbreak reporting, including capacity to detect and report outbreaks and political or economic barriers to reporting.

## **Dissemination**

We will share the results of this study at academic conferences and through peer-reviewed reports published in relevant research journals. All survey and interview participants will be provided a URL link to review study outputs. All study data will be retained and securely stored for at least five years following publications arising from this research. After the storage period, de-identified study data will be archived at the Australian Data Archive for use in later research, including potentially by other researchers [56].

## **Discussion**

In the wake of the COVID-19 pandemic, the world has begun the process of reforming the body of global health law that informs pandemic preparedness and response, including amending the 2005 IHR and adopting a new pandemic treaty [57-58]. The proposed reforms mainly target country-level barriers to outbreak reporting, particularly the capacity to detect and report outbreaks. However, all outbreak reports start at the local level before moving up through various layers of a country's public health system. As such, it will be crucial to evaluate and address the barriers at all levels of the outbreak reporting system to effect successful reforms to prepare for future outbreaks.

With outbreak reporting responsibilities at various levels of the public health system, FETP-trained officials represent a potentially invaluable source of information on the various barriers and enablers to outbreak reporting at all levels of a public health system. By evaluating the experiences of FETP trainees and graduates in the Asia-Pacific region, this study will build on previous studies that have evaluated outbreak reporting within specific country settings or among specific reporting groups to develop a more comprehensive overview of the various outbreak reporting barriers and enablers and to inform relevant approaches to improve reporting and collaborative response.

This study is subject to several limitations. Selection bias might affect the survey results, where persons with reliable internet access and fluency in the survey language will be more likely to complete the survey. In addition, this study will elicit the views and experiences of a select population of public health officials, which might constrain the applicability of the study findings beyond settings encountered by FETP-trained officials. This study mitigates these concerns by distributing the survey in a platform that is readily accessible among various mobile phone and computer devices and by recruiting persons with FETP experiences at different levels of government across various countries. Furthermore, potential respondents might choose not to participate in the survey or interviews for fear of being identified and

associated with their responses, leading to harmful professional, economic, or legal impacts. To mitigate privacy concerns, the survey and interviews will be fully anonymous, unless a participant asks to be identified.

This study is also limited by the study investigators' particular knowledge and experience. As such, the questions to be asked in the survey and interviews might not adequately account for the variety of challenges faced by FETP officials from a variety of different settings. To help address this bias, we will review and pilot this survey with persons who have experience with outbreak reporting in various countries in the Asia-Pacific region. In addition, the interview research journal will help to illuminate any biases with respect to the interviewer's questioning.

Despite these limitations, this study will fill a major gap in our understanding of the determinants of outbreak reporting across several geographic, political, and economic contexts by eliciting the viewpoints and experiences of persons with exposure to outbreak reporting across various settings. This information will help improve the outbreak reporting process, allowing for more timely reporting and helping prevent outbreaks from growing into devastating epidemics or pandemics.

## Author contributions

AT: conceptualization, methodology, writing – original draft preparation

RK, MDK, TH: methodology, supervision, writing – review and editing

## Acknowledgments

We thank Amy E. Parry for her invaluable recommendations while developing this project.

## References

- 449 1. World Health Organization. International Health Regulations (2005). 3rd ed. Geneva:  
450 World Health Organization; 2016.
- 451 2. Kickbusch I, Liu A. Global health diplomacy-reconstructing power and governance.  
452 Lancet. 2022 Jun 4;399(10341):2156-2166. doi: 10.1016/S0140-6736(22)00583-9.
- 453 3. Singh S, McNab C, Olson RM, Bristol N, Nolan C, Bergström E, et al. How an outbreak  
454 became a pandemic: a chronological analysis of crucial junctures and international  
455 obligations in the early months of the COVID-19 pandemic. Lancet. 2021 Dec  
456 4;398(10316):2109-2124. doi: 10.1016/S0140-6736(21)01897-3.
- 457 4. André AM, Lopez A, Perkins S, Lambert S, Chace L, Noudeke N, et al. Frontline Field  
458 Epidemiology Training Programs as a Strategy to Improve Disease Surveillance and  
459 Response. Emerg Infect Dis. 2017 Dec;23(13):S166–73. doi: 10.3201/eid2313.170803.
- 460 5. Al Nsour M, Khader Y, Bashier H, Alsoukhni M. Evaluation of Advanced Field  
461 Epidemiology Training Programs in the Eastern Mediterranean Region: A Multi-Country  
462 Study. Front Public Health. 2021 Jul 22;9:684174. doi: 10.3389/fpubh.2021.684174.
- 463 6. Nuclear Threat Initiative. Global Health Security Index: GHS Index Methodology  
464 [Internet]. Washington (DC): Nuclear Threat Initiative; 2021 November [cited 2023  
465 April 11]. Available from: [https://www.ghsindex.org/wp-](https://www.ghsindex.org/wp-content/uploads/2021/11/2021_GHSIndex_Methodology_FINAL.pdf)  
466 [content/uploads/2021/11/2021\\_GHSIndex\\_Methodology\\_FINAL.pdf](https://www.ghsindex.org/wp-content/uploads/2021/11/2021_GHSIndex_Methodology_FINAL.pdf)
- 467 7. Bochner AF, Makumbi I, Aderinola O, Abayneh A, Jetoh R, Yemanaberhan RL, et al.  
468 Implementation of the 7-1-7 target for detection, notification, and response to public  
469 health threats in five countries: a retrospective, observational study. Lancet Glob Health.  
470 2023 Jun;11(6):e871-e879. doi: 10.1016/S2214-109X(23)00133-X.
- 471 8. Do H, Ho HT, Tran PD, Nguyen DB, Otsu S, de Vázquez CC, et al. Building the hospital  
472 event-based surveillance system in Viet Nam: a qualitative study to identify potential

- 473 facilitators and barriers for event reporting. Western Pac Surveill Response J. 2020 Sep  
474 30;11(3):10-20. doi: 10.5365/wpsar.2019.10.1.009.
- 475 9. Fill MA, Murphree R, Pettit AC. Health Care Provider Knowledge and Attitudes  
476 Regarding Reporting Diseases and Events to Public Health Authorities in Tennessee. J  
477 Public Health Manag Pract. 2017 Nov/Dec;23(6):581-588. doi:  
478 10.1097/PHH.0000000000000492.
- 479 10. Lafond KE, Dalhatu I, Shinde V, Ekanem EE, Ahmed S, Peebles P, et al. Notifiable  
480 disease reporting among public sector physicians in Nigeria: a cross-sectional survey to  
481 evaluate possible barriers and identify best sources of information. BMC Health Serv  
482 Res. 2014 Nov 13;14:568. doi: 10.1186/s12913-014-0568-3.
- 483 11. Steele L, Orefuwa E, Dickmann P. Drivers of earlier infectious disease outbreak  
484 detection: a systematic literature review. Int J Infect Dis. 2016 Dec;53:15-20. doi:  
485 10.1016/j.ijid.2016.10.005.
- 486 12. Tan HF, Yeh CY, Chang HW, Chang CK, Tseng HF. Private doctors' practices,  
487 knowledge, and attitude to reporting of communicable diseases: a national survey in  
488 Taiwan. BMC Infect Dis. 2009 Jan 29;9:11. doi: 10.1186/1471-2334-9-11.
- 489 13. Packer C, Halabi SF, Hollmeyer H, Mithani SS, Wilson L, Ruckert A, et al. A survey of  
490 International Health Regulations National Focal Points experiences in carrying out their  
491 functions. Global Health. 2021 Mar 6;17(1):25. doi: 10.1186/s12992-021-00675-7.
- 492 14. Halabi S, Wilson K. The Independence of National Focal Points Under the International  
493 Health Regulations (2005). Harvard Int Law J. 2022;63(1):135-179.
- 494 15. Worsnop CZ. Concealing Disease: Trade and Travel Barriers and the Timeliness of  
495 Outbreak Reporting. Int Stud Perspect. 2019;20:344-372. doi: 10.1093/isp/ekz005.

- 496 16. de Groot RJ, Baker SC, Baric RS, Brown CS, Drosten C, Enjuanes L, et al. Middle East  
497 respiratory syndrome coronavirus (MERS-CoV): announcement of the Coronavirus  
498 Study Group. J Virol. 2013 Jul;87(14):7790-2. doi: 10.1128/JVI.01244-13.
- 499 17. Institute of Medicine (US) Forum on Microbial Threats. Learning from SARS: Preparing  
500 for the Next Disease Outbreak: Workshop Summary. Knobler S, Mahmoud A, Lemon S,  
501 Mack A, Sivitz L, Oberholtzer K, editors. Washington (DC): National Academies Press  
502 (US); 2004.
- 503 18. Piret J, Boivin G. Pandemics Throughout History. Front Microbiol. 2021 Jan  
504 15;11:631736. doi: 10.3389/fmicb.2020.631736. Erratum in: Front Microbiol. 2022 Sep  
505 27;13:988058.
- 506 19. World Bank Group. Population, total [Internet]. Washington (DC): World Bank Group;  
507 2023 [cited 2023 May 29]. Available from:  
508 <https://data.worldbank.org/indicator/SP.POP.TOTL>
- 509 20. World Health Assembly, 64. Implementation of the International Health Regulations  
510 (2005): Report of the Review Committee on the Functioning of the International Health  
511 Regulations (2005) in relation to Pandemic (H1N1) 2009: report by the Director-General  
512 (A64/10) [Internet]. Geneva: World Health Organization; 2011 [cited 2023 May 4].  
513 Available from: [https://apps.who.int/iris/bitstream/handle/10665/3350/A64\\_10-en.pdf](https://apps.who.int/iris/bitstream/handle/10665/3350/A64_10-en.pdf)
- 514 21. Bashir K, Wani KA, Qurieshi MA, Khan SMS, Haq I. Measles surveillance in Kashmir:  
515 A mixed methods study. Indian J Public Health. 2022 Jul-Sep;66(3):251-256. doi:  
516 10.4103/ijph.ijph\_1482\_21.
- 517 22. Craig AT, Kaldor J, Schierhout G, Rosewell AE. Surveillance strategies for the detection  
518 of disease outbreaks in the Pacific islands: meta-analysis of published literature, 2010-  
519 2019. Trop Med Int Health. 2020 Aug;25(8):906-918. doi: 10.1111/tmi.13448.

- 520 23. Manurung MK, Reo SE, Pardosi JF, Muscatello DJ. Evaluation of the Indonesian Early  
521 Warning Alert and Response System (EWARS) in West Papua, Indonesia. WHO South  
522 East Asia J Public Health. 2020 Sep;9(2):111-117. doi: 10.4103/2224-3151.294304.
- 523 24. Li M. Public Health Crises In Comparison: China's Epidemic Response Policies From  
524 SARS To COVID-19. Glob Public Health. 2021 Aug-Sep;16(8-9):1223-1236. doi:  
525 10.1080/17441692.2021.1919735.
- 526 25. Maciel AL, de Carvalho BA, Timmons S, Padoveze MC. Barriers to investigating and  
527 reporting nosocomial outbreaks to health authorities in São Paulo, Brazil: a mixed  
528 methods approach. J Hosp Infect. 2016 Dec;94(4):330-337. doi:  
529 10.1016/j.jhin.2016.06.022.
- 530 26. Doyle L, Brady AM, Byrne G. An overview of mixed methods research. J Res Nurs.  
531 2009;14(2):175-185. doi: 10.1177/1744987108093962.
- 532 27. Creswell JW, Plano Clark VL. Designing and conducting mixed methods research.  
533 London: SAGE Publications Ltd; 2007.
- 534 28. Palinkas LA, Horwitz SM, Green CA, Wisdom JP, Duan N, Hoagwood K. Purposeful  
535 Sampling for Qualitative Data Collection and Analysis in Mixed Method Implementation  
536 Research. Adm Policy Ment Health. 2015 Sep;42(5):533-44. doi: 10.1007/s10488-013-  
537 0528-y.
- 538 29. World Health Organization. WHO regional offices [Internet]. Geneva: World Health  
539 Organization; 2023 [cited 2023 May 29]. Available from:  
540 <https://www.who.int/about/who-we-are/regional-offices>
- 541 30. Training Programs in Epidemiology and Public Health Interventions Network. Vision,  
542 Mission and History [Internet]. Atlanta, GA: Training Programs in Epidemiology and

- Public Health Interventions Network; 2023 [cited 2023 September 25]. Available from:  
<https://www.tephinet.org/who-we-are/vision-mission-and-history>
31. Training Programs in Epidemiology and Public Health Interventions Network. Training programs [Internet]. Atlanta, GA: Training Programs in Epidemiology and Public Health Interventions Network; 2023 [cited 2023 May 29]. Available from:  
<https://www.tephinet.org/training-programs>
32. Bartlett JE, Kotrlik JW, Higgins CC. Organizational research: Determining appropriate sample size in survey research. *Information Technology, Learning, and Performance Journal*. 2001;19(1):43-50.
33. Wu M-J, Zhao K, Fils-Aime F. Response rates of online surveys in published research: A meta-analysis. *Computers in Human Behavior Reports*. 2022;7:100206. doi: 10.1016/j.chbr.2022.100206.
34. Saunders B, Sim J, Kingstone T, Baker S, Waterfield J, Bartlam B, et al. Saturation in qualitative research: exploring its conceptualization and operationalization. *Qual Quant*. 2018;52(4):1893-1907. doi: 10.1007/s11135-017-0574-8.
35. Braun V. *Successful qualitative research: A practical guide for beginners*. London: SAGE Publications Ltd; 2013.
36. Tricco AC, Lillie E, Zarin W, O'Brien KK, Colquhoun H, Levac D, et al. PRISMA Extension for Scoping Reviews (PRISMA-ScR): Checklist and Explanation. *Ann Intern Med*. 2018 Oct 2;169(7):467-473. doi: 10.7326/M18-0850.
37. World Health Organization. After Action Review (AAR) [Internet]. Geneva: World Health Organization; 2024 [cited 2024 January 24]. Available from:  
<https://extranet.who.int/sph/after-action-review>



- 566 38. Qualtrics. Qualtrics [Computer software]. Provo, UT: Qualtrics; 2020. Available from:  
567 <https://www.qualtrics.com>
- 568 39. Kluberg SA, Mekaru SR, McIver DJ, Madoff LC, Crawley AW, Smolinski MS, et al.  
569 Global Capacity for Emerging Infectious Disease Detection, 1996-2014. *Emerg Infect*  
570 *Dis.* 2016 Oct;22(10):E1-6. doi: 10.3201/eid2210.151956.
- 571 40. McAlarnen L, Smith K, Brownstein JS, Jerde C. Internet and free press are associated  
572 with reduced lags in global outbreak reporting. *PLoS Curr.* 2014 Oct  
573 30;6:ecurrents.outbreaks.ceddec16fa17091eea4c4a725dba9e16. doi:  
574 10.1371/currents.outbreaks.ceddec16fa17091eea4c4a725dba9e16.
- 575 41. Reporters Without Borders. World Press Freedom Index [Internet]. Paris: Reporters  
576 Without Borders; 2023 [cited 2023 September 25]. Available from:  
577 <https://rsf.org/en/index>
- 578 42. World Bank Group. World Bank Country and Lending Groups [Internet]. Washington  
579 (DC): World Bank Group; 2023 [cited 2023 September 25]. Available from:  
580 [https://datahelpdesk.worldbank.org/knowledgebase/articles/906519-world-bank-country-](https://datahelpdesk.worldbank.org/knowledgebase/articles/906519-world-bank-country-and-lending-groups)  
581 [and-lending-groups](https://datahelpdesk.worldbank.org/knowledgebase/articles/906519-world-bank-country-and-lending-groups)
- 582 43. World Bank Group. TCdata360 [Internet]. Washington (DC): World Bank Group; 2023  
583 [cited 2023 May 31]. Available from: <https://tcdata360.worldbank.org>
- 584 44. World Bank Group. Worldwide Governance Indicators [Internet]. Washington (DC):  
585 World Bank Group; 2023 [cited 2023 September 25]. Available from:  
586 <https://info.worldbank.org/governance/wgi/#home>
- 587 45. World Bank Group. States and Markets [Internet]. Washington (DC): World Bank  
588 Group; 2023 [cited 2023 September 25]. Available from:

- 589 <https://datatopics.worldbank.org/world-development-indicators/themes/states-and->
- 590 [markets.html](https://datatopics.worldbank.org/world-development-indicators/themes/states-and-markets.html)
- 591 46. Olmos-Vega FM, Stalmeijer RE, Varpio L, Kahlke R. A practical guide to reflexivity in
- 592 qualitative research: AMEE Guide No. 149. Med Teach. 2022 Apr 7;1-11. doi:
- 593 10.1080/0142159X.2022.2057287.
- 594 47. Peters MD, Godfrey CM, Khalil H, McInerney P, Parker D, Soares CB. Guidance for
- 595 conducting systematic scoping reviews. Int J Evid Based Healthc. 2015 Sep;13(3):141-6.
- 596 doi: 10.1097/XEB.0000000000000050.
- 597 48. Bell JA, Nuzzo JB. Global Health Security Index: Advancing Collective Action and
- 598 Accountability Amid Global Crisis [Internet]. Washington (DC): Nuclear Threat
- 599 Initiative; 2021 [cited 2023 May 5]. Available from: [https://www.ghsindex.org/wp-](https://www.ghsindex.org/wp-content/uploads/2021/12/2021_GHSIndexFullReport_Final.pdf)
- 600 [content/uploads/2021/12/2021\\_GHSIndexFullReport\\_Final.pdf](https://www.ghsindex.org/wp-content/uploads/2021/12/2021_GHSIndexFullReport_Final.pdf)
- 601 49. R Core Team. R: A language and environment for statistical computing [Computer
- 602 software]. Vienna, Austria: R Foundation for Statistical Computing; 2022. Available
- 603 from: <https://www.R-project.org/>
- 604 50. Ayton D, Tsindos T, Berkovic D. Qualitative Research – a practical guide for health and
- 605 social care researchers and practitioners. Melbourne, Australia: Monash University;
- 606 2023.
- 607 51. Fetters MD, Curry LA, Creswell JW. Achieving integration in mixed methods designs-
- 608 principles and practices. Health Serv Res. 2013 Dec;48(6 Pt 2):2134-56. doi:
- 609 10.1111/1475-6773.12117.
- 610 52. Gale NK, Heath G, Cameron E, Rashid S, Redwood S. Using the framework method for
- 611 the analysis of qualitative data in multi-disciplinary health research. BMC Med Res
- 612 Methodol. 2013 Sep 18;13:117. doi: 10.1186/1471-2288-13-117.

- 613 53. Braun V, Clarke V, Hayfield N, Terry G. Thematic Analysis. In Liamputtong P, editor.  
614 Handbook of Research Methods in Health Social Sciences. Singapore: Springer Nature  
615 Singapore Pte Ltd; 2019. p. 843-860.
- 616 54. Lumivero. NVivo (Version 12) [Computer software]. Denver, CO: Lumivero; 2018.  
617 Available from: <https://www.lumivero.com>
- 618 55. Guetterman TC, Fetters MD, Creswell JW. Integrating Quantitative and Qualitative  
619 Results in Health Science Mixed Methods Research Through Joint Displays. Ann Fam  
620 Med. 2015 Nov;13(6):554-61. doi: 10.1370/afm.1865.
- 621 56. Australian Data Archive. The Australian Data Archive [Internet]. Canberra, Australia:  
622 Australian Data Archive; 2024 [cited 2024 January 24]. Available from:  
623 <https://ada.edu.au/>
- 624 57. Intergovernmental Negotiating Body to Draft and Negotiate a WHO Convention,  
625 Agreement or Other International Instrument on Pandemic Prevention, Preparedness and  
626 Response. Zero draft of the WHO CA+ for the consideration of the Intergovernmental  
627 Negotiating Body at its fourth meeting [Internet]. Geneva: World Health Organization;  
628 2023 Feb 1 [cited 2023 Feb 17]. Available from:  
629 [https://apps.who.int/gb/inb/pdf\\_files/inb4/A\\_INB4\\_3-en.pdf](https://apps.who.int/gb/inb/pdf_files/inb4/A_INB4_3-en.pdf)
- 630 58. Working Group on Amendments to the International Health Regulations (2005). Article-  
631 by-Article Compilation of Proposed Amendments to the International Health Regulations  
632 (2005) submitted in accordance with decision WHA75(9) (2022) [Internet]. Geneva:  
633 World Health Organization [cited 2023 Jun 11]. Available from:  
634 [https://apps.who.int/gb/wgihr/pdf\\_files/wgihr1/WGIHR\\_Compilation-en.pdf](https://apps.who.int/gb/wgihr/pdf_files/wgihr1/WGIHR_Compilation-en.pdf)

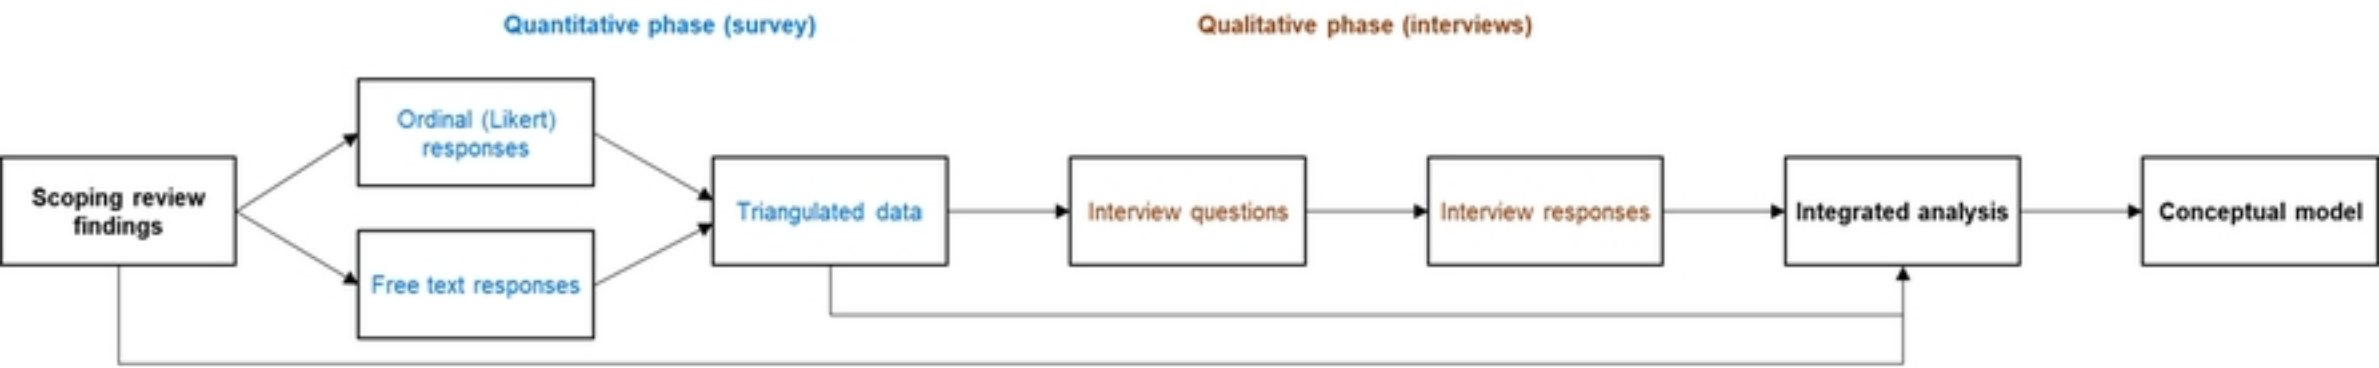

Figure
